# Supplementary material for: Bioinformatics analysis and experimental validation of cuproptosis-related lncRNA LINC02154 in clear cell renal cell carcinoma
Source: Springer Nature journal article supplement (doi:10.1186/s12885-023-10639-2), 2023-02-16
Supplement: MOESM1 [file 24036052]

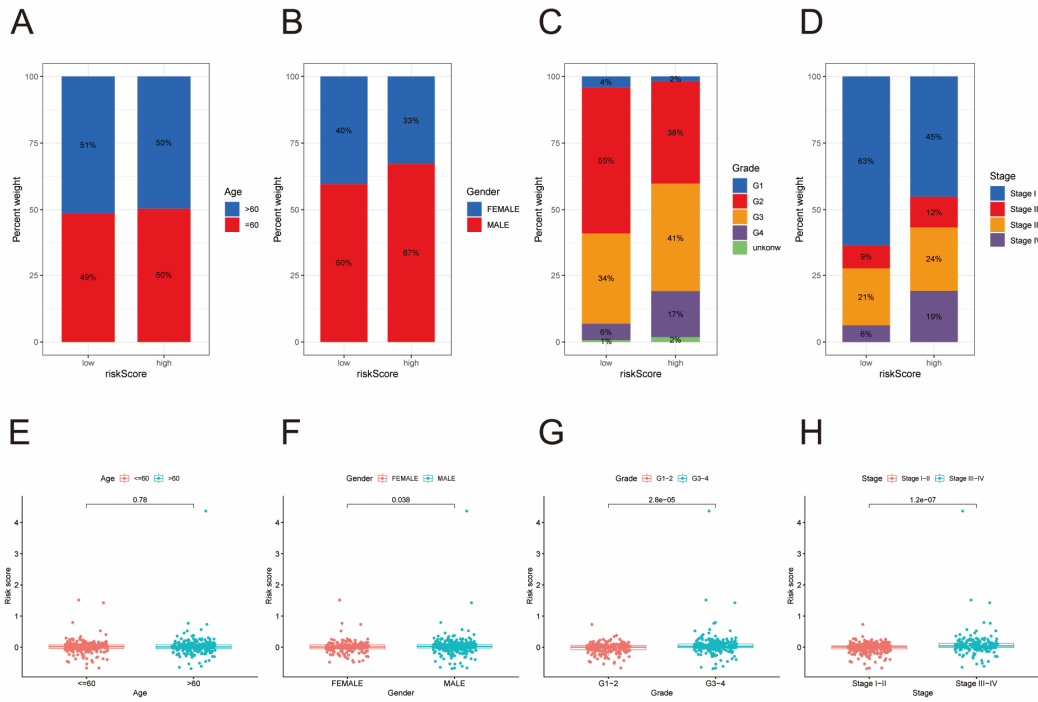

**Supplementary Figure S3: S3A-D** Different proportions of age, gender, stage, and grade were observed between the high and low-risk signature groups; **S3E-H** Risk signature score across ages, genders, stages, and grades.
