# Supplementary material for: Bioinformatics analysis and experimental validation of cuproptosis-related lncRNA LINC02154 in clear cell renal cell carcinoma
Source: Springer Nature journal article supplement (doi:10.1186/s12885-023-10639-2), 2023-02-16
Supplement: MOESM2 [file 24036052]

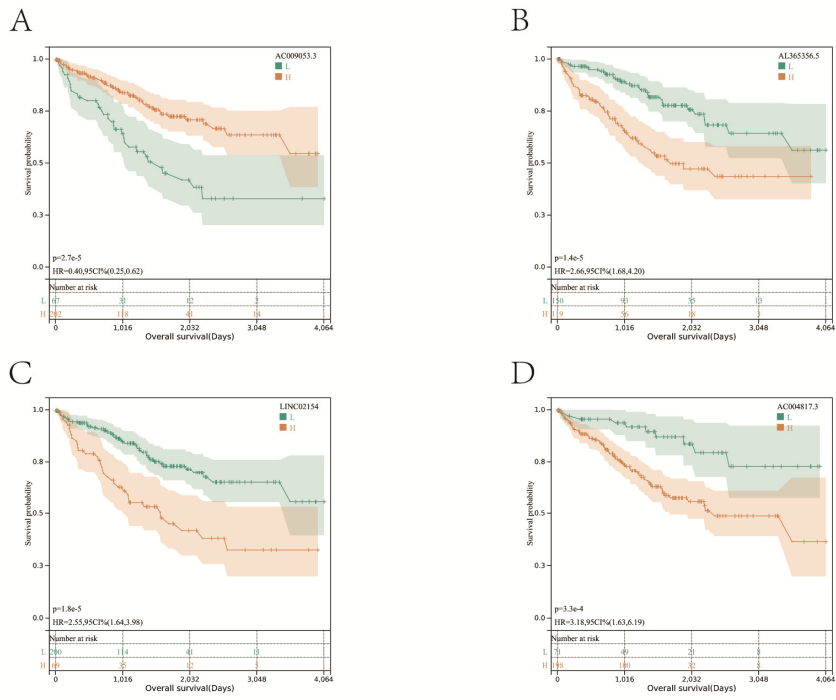

**Supplementary Figure S2: S2A-D** Single-gene survival analysis was performed on four genes in the risk signature in the testing set.
