# Supplementary material for: Bioinformatics analysis and experimental validation of cuproptosis-related lncRNA LINC02154 in clear cell renal cell carcinoma
Source: Springer Nature journal article supplement (doi:10.1186/s12885-023-10639-2), 2023-02-16
Supplement: MOESM3 [file 24036052]

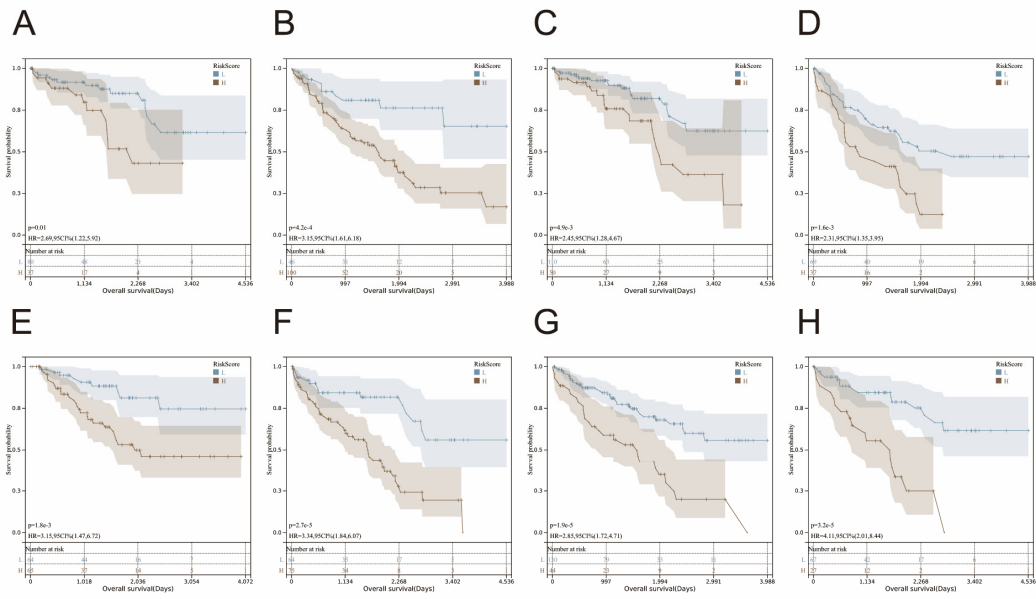

**Supplementary Figure S4: S4A-H** In the training set, grade, stage, age, and gender were significantly associated with outcomes.
