# Supplementary material for: Bioinformatics analysis and experimental validation of cuproptosis-related lncRNA LINC02154 in clear cell renal cell carcinoma
Source: Springer Nature journal article supplement (doi:10.1186/s12885-023-10639-2), 2023-02-16
Supplement: MOESM5 [file 24036052]

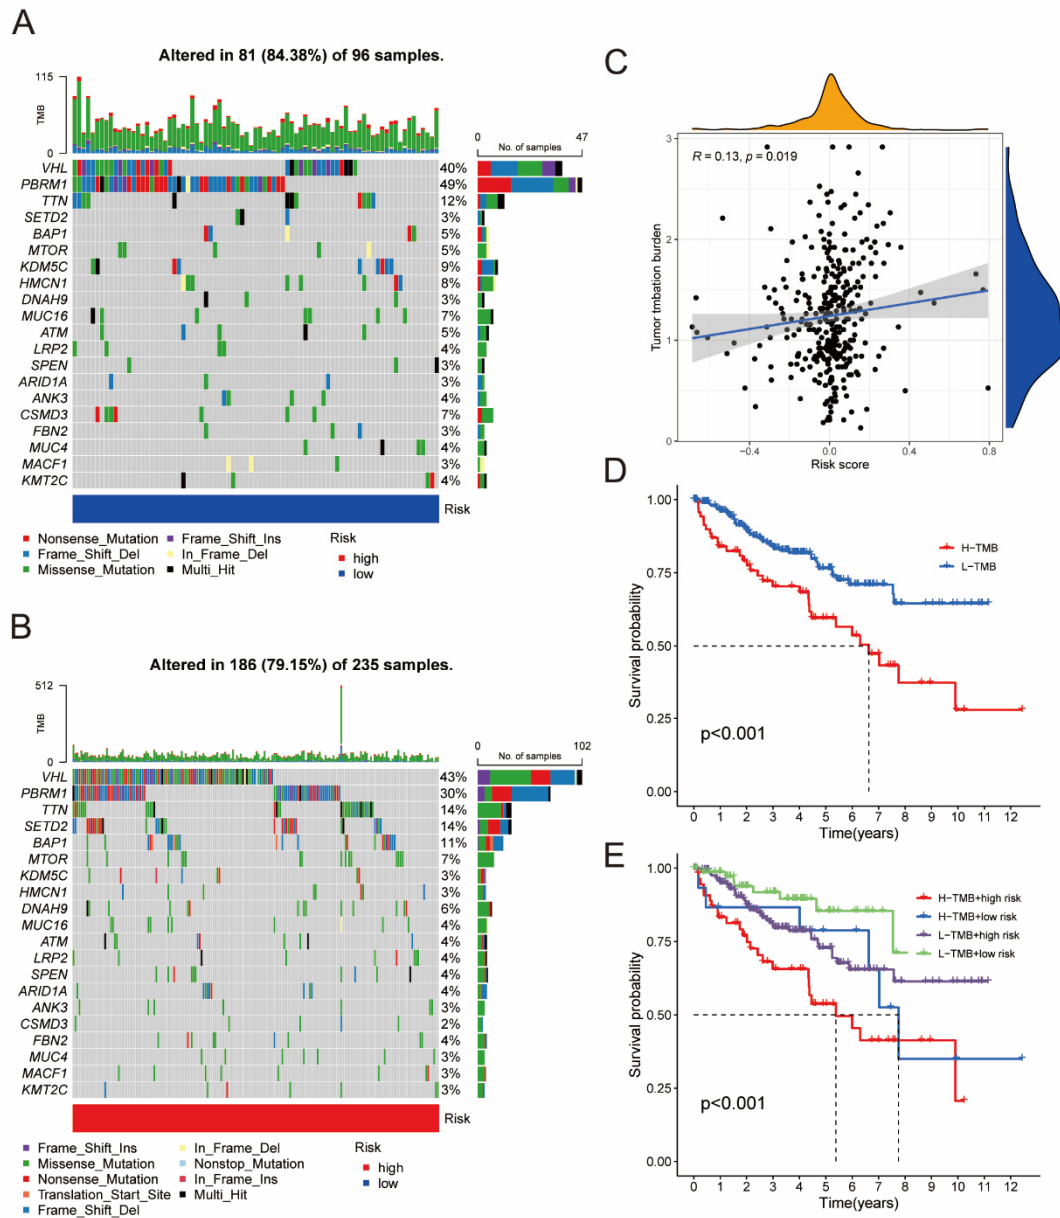

**Supplementary Figure S6: S6A** Tumor-associated gene mutation burden in samples from the low-risk group; **S6B** Tumor-associated gene mutation burden in samples from the high-risk group; **S6C** Positive relationship between risk score and tumor mutation burden; **S6D** Survival analysis of high and low tumor mutation burden groups; **S6E** Survival analysis of H-TMB + high-risk group, H-TMB + low-risk group, L-TMB +

high-risk group, L-TMB + low-risk group.
