# Supplementary material for: Bioinformatics analysis and experimental validation of cuproptosis-related lncRNA LINC02154 in clear cell renal cell carcinoma
Source: Springer Nature journal article supplement (doi:10.1186/s12885-023-10639-2), 2023-02-16
Supplement: MOESM6 [file 24036052]

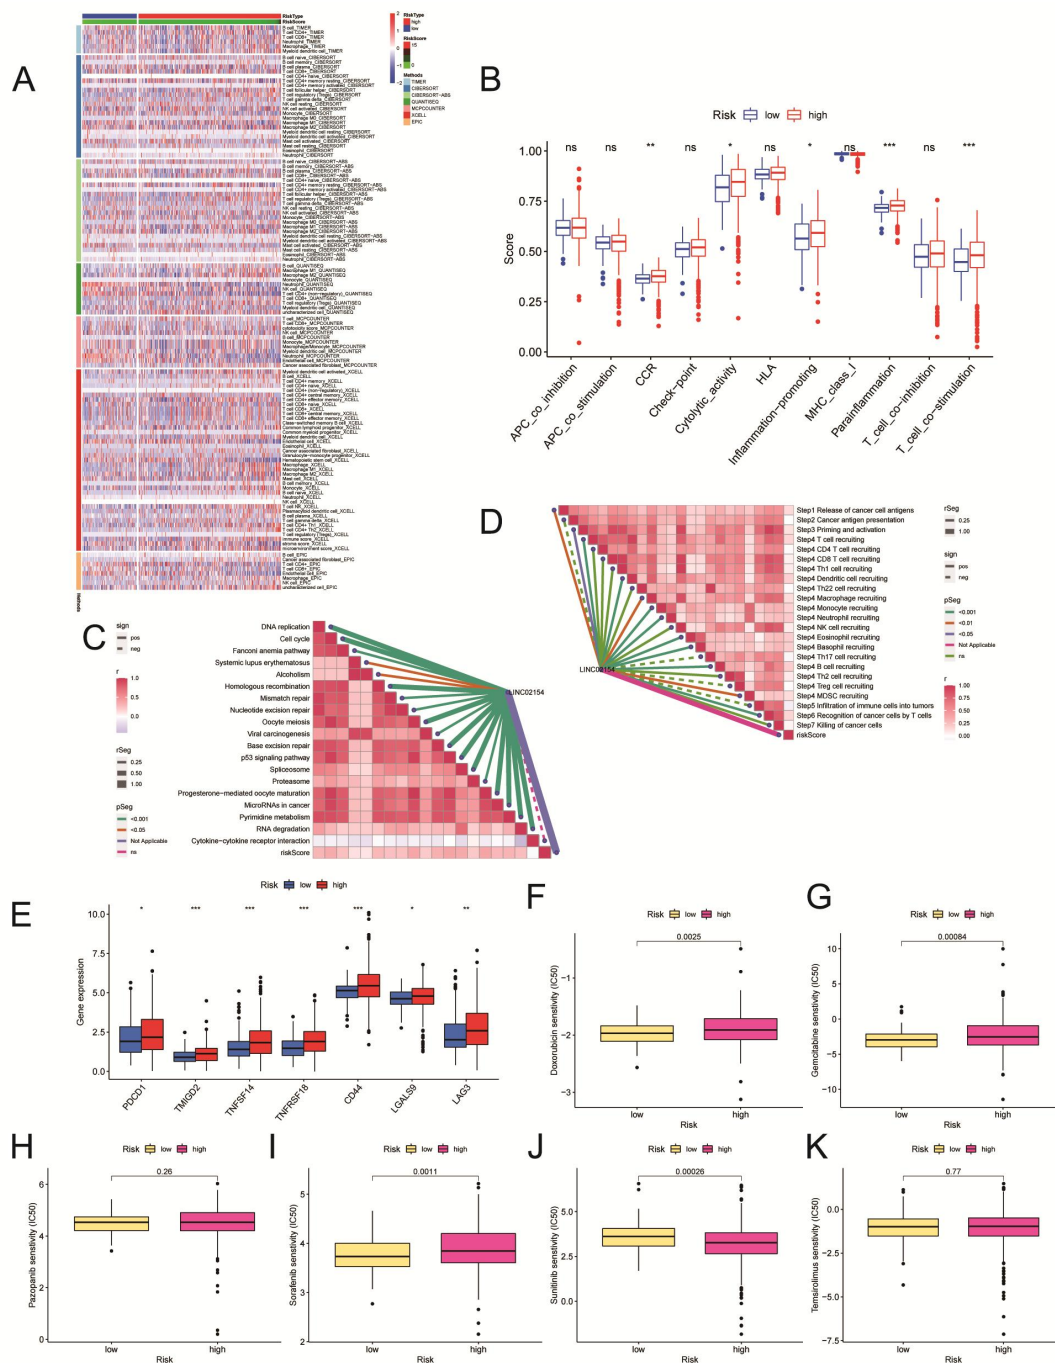

**Supplementary Figure S7: S7A** Relationship between risk score type and immune molecular typing; **S7B** Analysis of immune function in low- and high-risk groups; **S7C** Correlation analysis between risk score and positive markers related to immunotherapy; **S7D** Analysis of the correlation between risk scores and critical steps of the cancer immunity cycle; **S7E** Immune checkpoint analysis in high- and low-risk

groups; **S7F-L** Susceptibility analysis was performed separately for axitinib, doxorubicin, gemcitabine, pazopanib, sorafenib, sunitinib, and temsirolimus in high- and low-risk groups.
